# Supplementary material for: PDGF Modulates BMP2‐Induced Osteogenesis in Periosteal Progenitor Cells
Source: PubMed Central journal article supplement (PMC6524680; doi:10.1002/jbm4.10127), 2019-01-15
Supplement: JBM4-3-na-s001.pdf [file JBM4-3-na-s001.pdf]

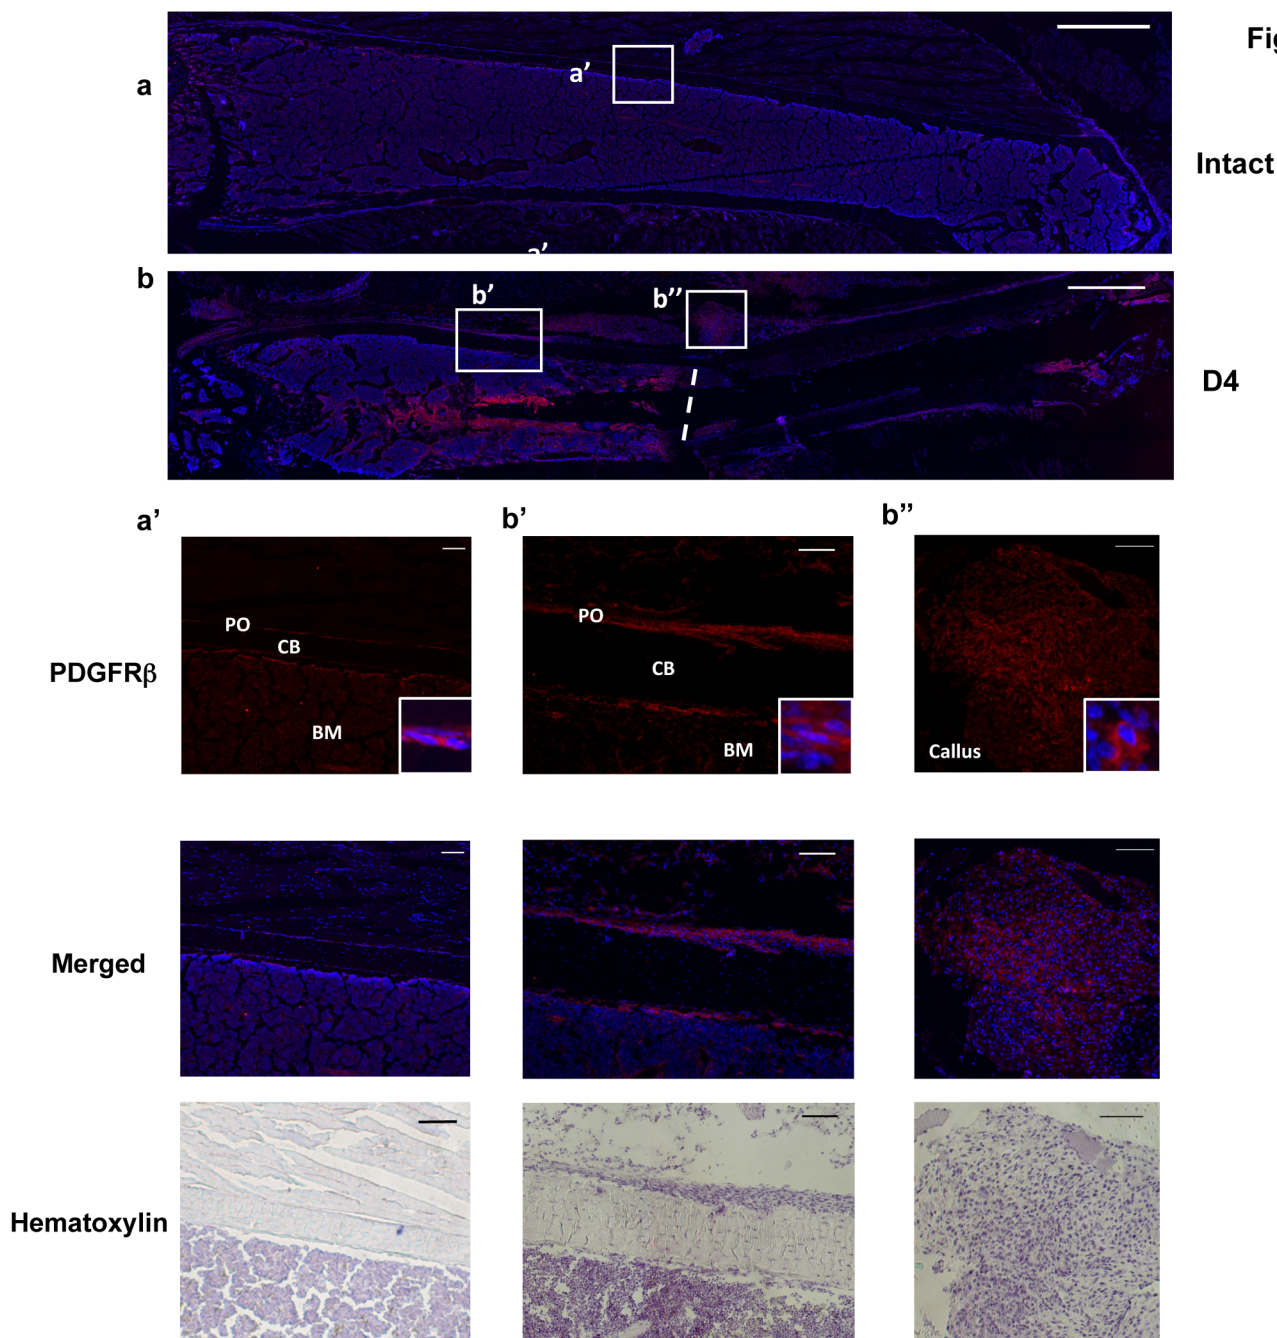

**Figure S1: Periosteal progenitor cells express PDGFR $\beta$  during fracture repair.**

(a). Representative images of PDGFR $\beta$  expression in intact periosteum by immunofluorescent staining. Frozen section of intact femur from a 8-week old mouse was stained with anti-PDGFR $\beta$  (Red: Alexa Fluor 647) and DAPI (blue). (a'). PDGFR $\beta$  cells were detected on periosteum, endosteum and bone marrow and PDGFR $\beta$  was expressed on cell surface (magnified image showing representative cells on periosteum). The same section was stained by Hematoxylin.

(b). Representative images of PDGFR $\beta$  expression on day 4 after fracture by immunofluorescent staining. Dashed line indicates fracture site. Thickened periosteum close to fracture site (b') and periosteal callus (b'') areas were magnified.

PO=periosteum, CB= cortical bone, BM= bone marrow. Scale bars=1000 $\mu$ m (a-b); 100  $\mu$ m (a'-b'').

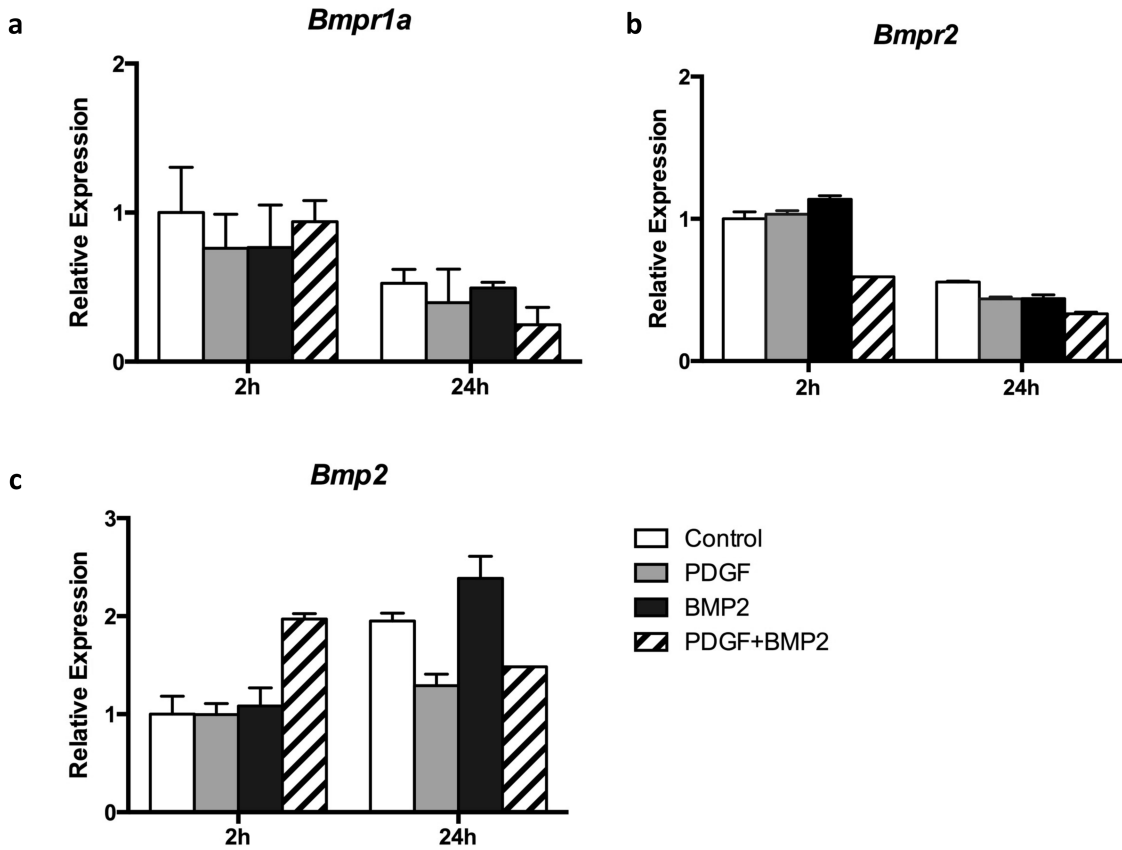

**Figure S2: Endogenous BMP2 and BMPR expressions were not changed by PDGF-BB.**

PDCs were treated with PDGF-BB and/or BMP2 for 24 hours after serum starvation. The mRNA level of gene expression was assessed by qRT-PCR at different time points. Gene expression of *Bmpr1a* (a), *Bmpr2* (b) and *Bmp2* (c) at 2 and 24 hours after treatment of PDCs. The average expression of untreated control was normalized to 1. Values are mean  $\pm$  SD. A representative of three experiments is shown.

Fig S3

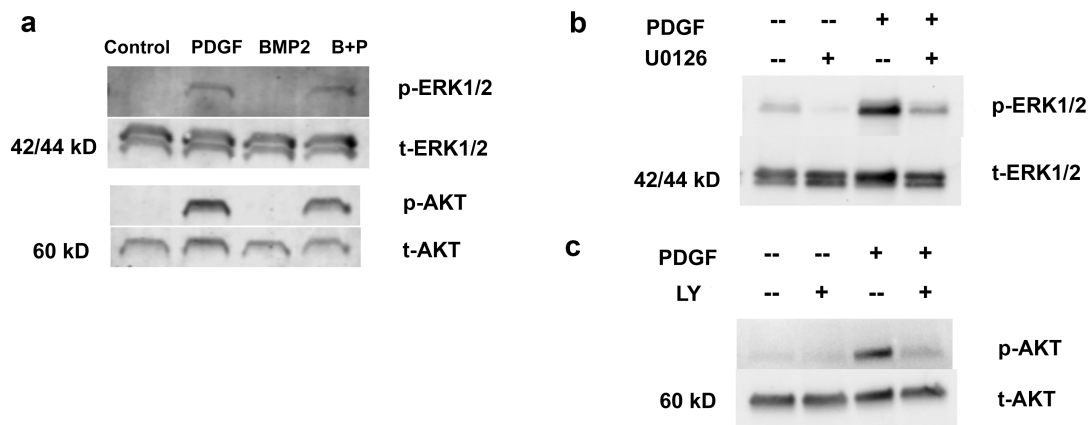

**Figure S3: PDGF-BB activated ERK1/2 MAPK and PI3K/AKT pathway in PDCs.**

(a). PDCs were treated with 10ng/ml PDGF-BB and/or 100ng/ml BMP2 for 30 minutes. Total cell lysates were immunoblotted with anti-pAKT, anti-AKT anti-pERK1/2 anti-ERK1/2.

(b). PDCs were pretreated with ERK1/2 inhibitor U0126 (10 $\mu$ M) for 1 hour, followed by the treatment of 10ng/ml PDGF-BB for 30 minutes. Total cell lysates were immunoblotted with anti-pERK1/2 and anti-ERK1/2.

(c). PDCs were pretreated with AKT inhibitor LY294002 (10 $\mu$ M) for 1 hour, followed by the treatment of 10ng/ml PDGF-BB for 30 minutes. Total cell lysates were immunoblotted with anti-pAKT and anti-AKT.

LY= LY294002. The gels presented are representative of three experiments.

**Table S1: Antibodies used for flow cytometry.**

| Epitope      | Conjugate      | Manufacturer | Clone   | Dilution |
|--------------|----------------|--------------|---------|----------|
| CD45         | eFluor 450     | eBioscience  | 30-F11  | 1:400    |
| Ter119       | eFluor 450     | eBioscience  | TER-119 | 1:200    |
| CD31         | eFluor 450     | eBioscience  | 390     | 1:400    |
| CD140a       | APC            | eBioscience  | APA5    | 1:100    |
| CD140b       | Biotin         | eBioscience  | APB5    | 1:100    |
| Sca-1        | FITC           | eBioscience  | D7      | 1:200    |
| CD105        | APC            | eBioscience  | MJ7/18  | 1:200    |
| CD51         | Biotin         | Biolegend    | RMV-7   | 1:100    |
| CD90.2       | FITC           | eBioscience  | 30-H12  | 1:200    |
| Streptavidin | APC eFluor 780 | eBioscience  | 47-4317 | 1:400    |
| Streptavidin | PE             | eBioscience  | 12-4317 | 1:400    |

**Table S2: Primers used for real time PCR.**

| Gene   | Forward (5'-3')        | Reverse (5'-3')         |
|--------|------------------------|-------------------------|
| Dlx5   | GCCCCTACCACCAGTACG     | TCACCATCCTCACCTCTGG     |
| Noggin | CACTATCTACACATCCGCCAG  | AGCGTCTCGTTCAGATCCTTCT  |
| Id1    | CTCTACGACATGAACGGCTGT  | TGCTCACCTTGCGGTTCT G    |
| Bmpr1a | GGTTCAGCGAACTATTGCCAAA | TCACCACGCCATTTACCCA     |
| Bmpr2  | TACAACACCACTCAGTCCGC   | CCTGTCTCCTGTCAACATTCTG  |
| Bmp2   | TGGAAGTGGCCCATTTAGAG   | TGACGCTTTTCTCGTTTGTG    |
| Gapdh  | AGGTCGGTGTGAACGGATTTG  | TGTAGACCATGTAGTTGAGGTCA |

**Taqman primers**

| Gene              | Assay reference |
|-------------------|-----------------|
| Gapdh             | Mm99999915 g1   |
| Bone sialoprotein | Mm00492555 m1   |
| Osteocalcin       | Mm03413826 mH   |
| Alp               | Mm01187117 m1   |

**Table S3: Antibodies used for western blots.**

| Antibody                          | Source            | Dilution | Company           | Catalog#  |
|-----------------------------------|-------------------|----------|-------------------|-----------|
| Phospho-p44/42MAPK(ERK1/2)        | Rabbit (poly-IgG) | 1:1000   | Cell signaling    | 9101      |
| p44/42MAPK(ERK1/2)                | Rabbit (poly-IgG) | 1:1000   | Cell signaling    | 9102      |
| Phospho-AKT (Ser473)              | Rabbit (poly-IgG) | 1:1000   | Cell signaling    | 9271      |
| AKT(pan) (40D4)                   | Mouse (Mono-IgG)  | 1:1000   | Cell signaling    | 2920      |
| Phospho-Smad1/Smad5/Smad9 (D5B10) | Rabbit (Mono-IgG) | 1:1000   | Cell signaling    | 13820     |
| Smad1 (D59D7)                     | Rabbit (Mono-IgG) | 1:1000   | Cell signaling    | 6944      |
| Phospho-Tyrosine(p-Try-100)       | Mouse (Mono-IgG)  | 1:1000   | Cell signaling    | 9411      |
| PDGFR $\beta$                     | Rabbit (mono-IgG) | 1:1000   | Thermo Scientific | MA5-15143 |
| GAPDH                             | Rabbit (poly-IgG) | 1:1000   | Santa Cruz        | Sc-25778  |
